# Supplementary material
Source: Springer Nature journal article supplement (https://www.springermedizin.de/resource/supplementary/12979_2010_85_MOESM2_ESM.pdf/9603330)

**(a)**

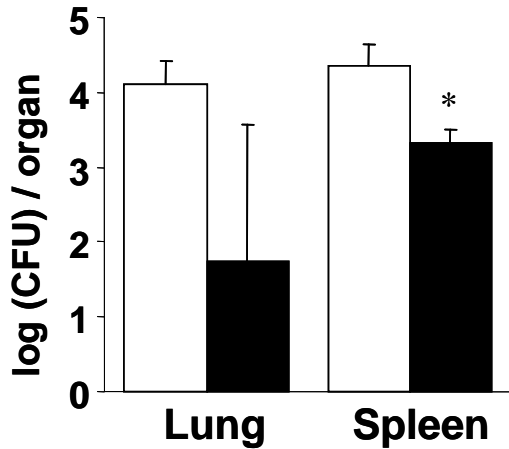

**(b)**

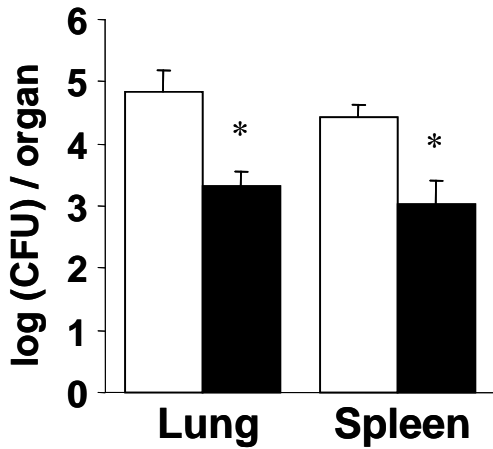

Supplement: MOESM2 [file 9603330]
